# Supplementary material for: Various amide derivatives induced Keggin-type SiW12O404−-based cobalt complexes: assembly, structure, electrochemical sensing and dye adsorption properties
Source: Royal Society of Chemistry journal article supplement (doi:10.1039/d1ce01619a), 2022-01-01
Supplement: d1ce01619a1.pdf [file d1ce01619a1.pdf]

## Supporting Information

### Various Amide-derivatives Induced Keggin-type $\text{SiW}_{12}\text{O}_{40}^{4-}$ -based Cobalt Complexes: Assembly, Structure, Electrochemical Sensing and Dye Adsorption Properties

Lei Li,<sup>‡</sup> Yue Zhang,<sup>‡</sup> Xiang Wang, Na Xu, Xiao-Hui Li\* and Xiu-Li Wang\*

*College of Chemistry and Materials Engineering, Professional Technology Innovation Center of Liaoning Province for Conversion Materials of Solar Cell, Bohai University, Jinzhou 121013, P. R. China*

**Table. S1.** Selected bond distances (Å) and angles (°) for complexes 1–3.

| Complex 1                                |           |                  |           |
|------------------------------------------|-----------|------------------|-----------|
| Co(1)-O(2)                               | 2.150(7)  | Co(1)-O(1)       | 2.149(7)  |
| Co(1)-N(2)                               | 2.098(9)  | Co(1)-N(1)       | 2.090(9)  |
| Co(1)-O(2W)                              | 2.144(9)  | Co(1)-O(1W)      | 2.110(10) |
| O(1)-Co(1)-O(2)                          | 170.2(3)  | N(2)-Co(1)-O(2)  | 79.0(3)   |
| N(2)-Co(1)-O(1)                          | 92.8(3)   | N(2)-Co(1)-O(2W) | 86.8(4)   |
| N(2)-Co(1)-O(1W)                         | 165.7(4)  | N(1)-Co(1)-O(2)  | 99.2(3)   |
| N(1)-Co(1)-O(1)                          | 77.9(3)   | N(1)-Co(1)-N(2)  | 107.0(4)  |
| N(1)-Co(1)-O(2W)                         | 165.3(4)  | N(1)-Co(1)-O(1W) | 86.4(4)   |
| O(2W)-Co(1)-O(2)                         | 88.3(3)   | O(2W)-Co(1)-O(1) | 96.7(3)   |
| O(1W)-Co(1)-O(2)                         | 94.2(4)   | O(1W)-Co(1)-O(1) | 94.9(4)   |
| O(1W)-Co(1)-O(2W)                        | 80.5(4)   |                  |           |
| Symmetry code for 1: #1 -x+2, -y+1, -z   |           |                  |           |
| Complex 2                                |           |                  |           |
| Co(1)-O(1)                               | 2.103(10) | Co(1)-O(2)       | 2.122(10) |
| Co(1)-O(1W)                              | 2.150(10) | Co(1)-O(5)       | 2.155(11) |
| Co(1)-N(1)                               | 2.072(12) | Co(1)-N(2)       | 2.081(12) |
| O(1)-Co(1)-O(2)                          | 174.8(4)  | O(1)-Co(1)-O(1W) | 88.3(4)   |
| O(1)-Co(1)-O(5)                          | 87.9(4)   | O(2)-Co(1)-O(1W) | 88.8(4)   |
| O(2)-Co(1)-O(5)                          | 94.7(4)   | O(1W)-Co(1)-O(5) | 175.0(4)  |
| N(1)-Co(1)-O(1)                          | 96.7(5)   | N(1)-Co(1)-O(2)  | 78.8(5)   |
| N(1)-Co(1)-O(1W)                         | 85.8(4)   | N(1)-Co(1)-O(5)  | 91.4(5)   |
| N(1)-Co(1)-N(2)                          | 176.9(5)  | N(2)-Co(1)-O(1)  | 80.3(4)   |
| N(2)-Co(1)-O(2)                          | 104.1(4)  | N(2)-Co(1)-O(1W) | 93.3(4)   |
| N(2)-Co(1)-O(5)                          | 89.3(5)   |                  |           |
| Symmetry code for 2: #1 -x+1, -y+1, -z+1 |           |                  |           |
| Complex 3                                |           |                  |           |
| Co(1)-O(2)                               | 2.212(12) | Co(1)-N(2)#2     | 2.071(14) |

|                    |           |                     |           |
|--------------------|-----------|---------------------|-----------|
| Co(1)-O(4)#2       | 2.071(14) | Co(1)-O(5)          | 2.081(11) |
| Co(1)-O(1W)        | 2.043(13) | Co(1)-N(4)          | 2.050(15) |
| N(2)#2-Co(1)-O(2)  | 84.3(5)   | N(2)#2-Co(1)-O(4)#2 | 79.1(5)   |
| N(2)#2-Co(1)-O(5)  | 92.8(5)   | O(4)#2-Co(1)-O(2)   | 92.9(5)   |
| O(5)-Co(1)-O(2)    | 88.4(5)   | O(5)-Co(1)-O(4)#2   | 171.6(5)  |
| O(1W)-Co(1)-O(2)   | 174.8(5)  | O(1W)-Co(1)-N(2)#2  | 100.3(6)  |
| O(1W)-Co(1)-O(4)#2 | 90.2(5)   | O(1W)-Co(1)-O(5)    | 89.1(5)   |
| O(1W)-Co(1)-N(4)   | 97.6(6)   | N(4)-Co(1)-O(4)#2   | 77.8(5)   |
| N(4)-Co(1)-N(2)#2  | 161.9(6)  | N(4)-Co(1)-O(4)     | 99.1(5)   |
| N(4)-Co(1)-O(5)    | 89.3(5)   |                     |           |

Symmetry code for **3**: #1 -x+2, -y+1, -z+1    #2 x, y+1, z    #3 x, y-1, z

**Table. S2.** Selected hydrogen bonding geometry (Å, °) for complexes **1–3**.

| Complex  | D–H···A       | D–H / Å | H···A / Å | D···A / Å | D–H···A / ° |
|----------|---------------|---------|-----------|-----------|-------------|
| <b>1</b> | N6–H6···O11   | 0.86    | 2.19      | 2.957     | 148         |
|          | N4–H4···O23   | 0.86    | 2.09      | 2.874     | 151         |
|          | N5–H5···O19   | 0.86    | 2.42      | 2.982     | 123         |
| <b>2</b> | O1W–H1WA···O2 | 0.886   | 2.012     | 2.742     | 135         |
| <b>3</b> | O1–H1···N3    | 0.86    | 2.00      | 2.851     | 171         |

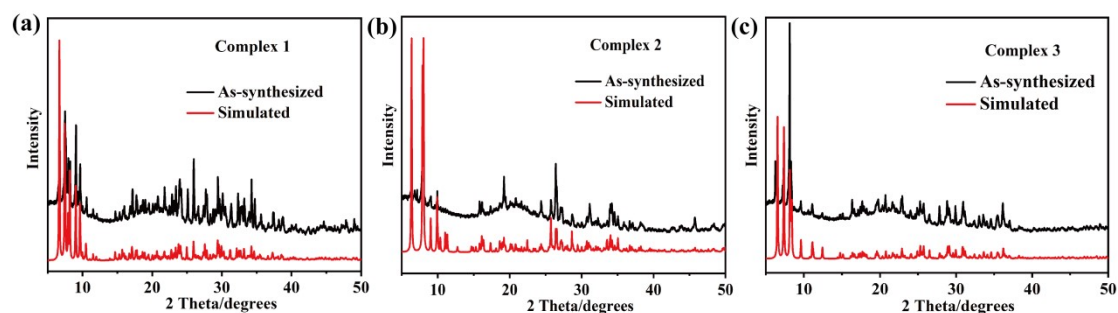

**Fig. S1** The PXRD patterns of complexes **1–3**.

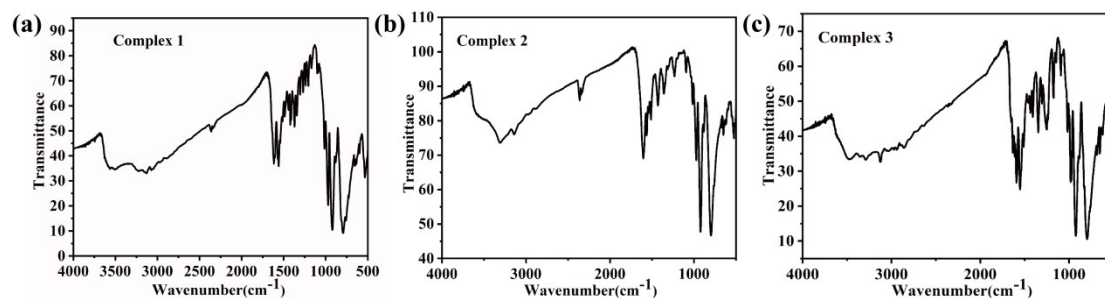

**Fig. S2** The IR spectra of complexes **1–3**.

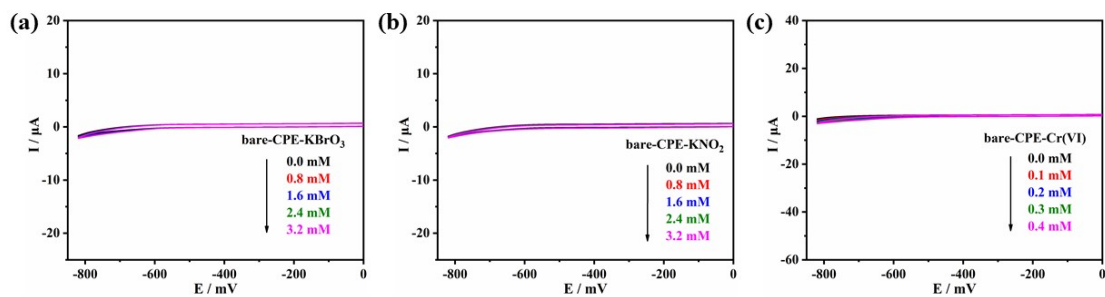

**Fig. S3** The cyclic voltammograms of the bare-CPE in electrolyte solution containing  $\text{BrO}_3^-$ ,  $\text{NO}_2^-$  and  $\text{Cr(VI)}$  ions.

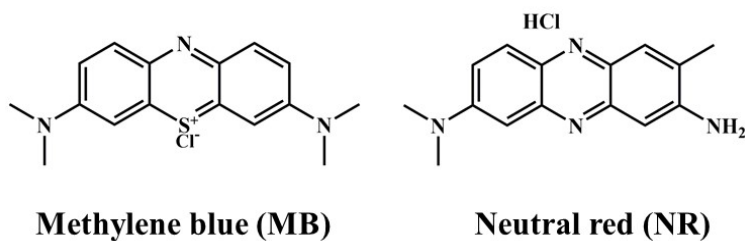

**Fig. S4** The structural diagram of the selected organic dyes MB and NR.

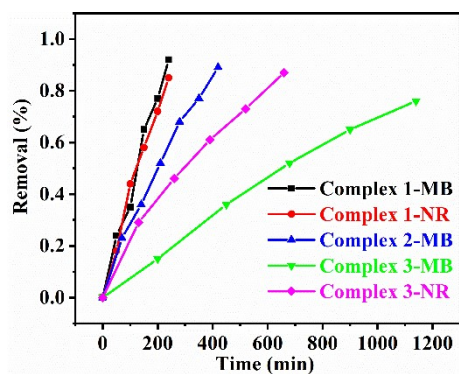

**Fig. S5** Removal rate of organic dyes MB and NR by complexes 1–3 with time.

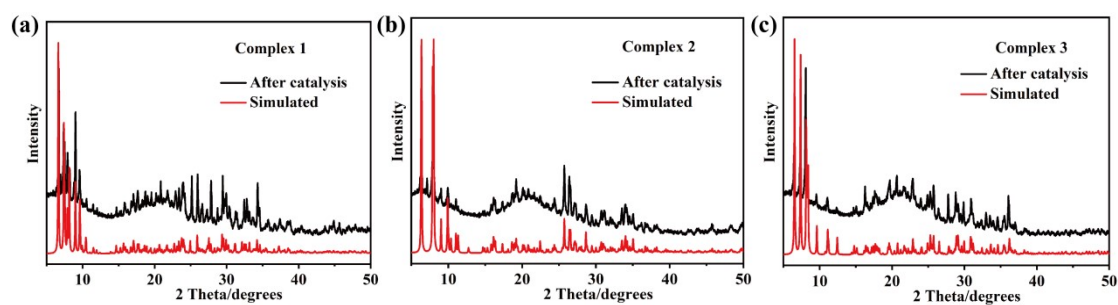

**Fig. S6** PXRD patterns of complexes 1–3 after adsorption of MB.

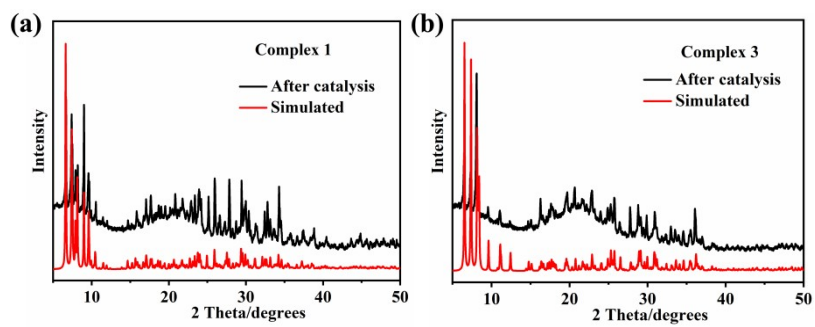

**Fig. S7** PXRD patterns of complexes **1** and **3** after adsorption for NR.
